# Supplementary material for: Complementary Differences in Primary Production and Phenology among Vegetation Types Increase Ecosystem Resilience to Climate Change and Grazing Pressure in an Iconic Mediterranean Ecosystem
Source: MDPI journal article supplement (doi:10.3390/rs13193920), 2021-09-30
Supplement: s1 [file s1]

### **Description of files included in this folder**

**database:** Is the database including the end-of-the-season values of ungulate census (Those that were used for the final models included in the manuscript)

**database1:** Is the database including the beginning-of-the-season values of ungulate census (Those that were not used for the final models included in the manuscript)

**Script:** Is an R file including the complete code used to performed the analyses and to create all tables and plots with the models results. This file also describes every part of the code and its reference to the different tables and figures in the manuscript.
